# Supplementary material
Source: PubMed Central journal article supplement (PMC4289138)
Supplement: NIHMS581564-supplement-Supplementary_Material.pdf [file NIHMS581564-supplement-Supplementary_Material.pdf]

## Supplemental Material

Supplemental Table 1. Results for all parameters in adjusted models assessing the association between gene expression and CRP and IL6 levels

| Dependent Variable: CRP     | ALOX5        |          | CD163        |          | CRP          |          | ICAM1        |          | IFIT1        |          | IL6          |          | NFKB1        |          | NFKBIA       |          | PTGER2       |          | S100A9       |          | SELENBP1     |          | SIRPA        |          | TLR2         |          | TLR4         |          | TNFRSF1B     |          |             |          |
|-----------------------------|--------------|----------|--------------|----------|--------------|----------|--------------|----------|--------------|----------|--------------|----------|--------------|----------|--------------|----------|--------------|----------|--------------|----------|--------------|----------|--------------|----------|--------------|----------|--------------|----------|--------------|----------|-------------|----------|
|                             | coef.        | p-value  | coef.        | p-value  | coef.        | p-value  | coef.        | p-value  | coef.        | p-value  | coef.        | p-value  | coef.        | p-value  | coef.        | p-value  | coef.        | p-value  | coef.        | p-value  | coef.        | p-value  | coef.        | p-value  | coef.        | p-value  | coef.        | p-value  | coef.        | p-value  |             |          |
| dCI*                        | 0.020±0.008  | p=0.0110 | 0.018±0.008  | p=0.0248 | -0.012±0.006 | p=0.0525 | 0.010±0.008  | p=0.1954 | 0.008±0.007  | p=0.2371 | -0.009±0.007 | p=0.2036 | 0.020±0.008  | p=0.0129 | 0.005±0.007  | p=0.4637 | 0.022±0.008  | p=0.0059 | 0.029±0.008  | p=0.0001 | 0.022±0.007  | p=0.0026 | 0.011±0.007  | p=0.1296 | 0.012±0.007  | p=0.0626 | 0.019±0.008  | p=0.0196 | 0.022±0.008  | p=0.0043 |             |          |
| Age, y                      | -0.015±0.003 | p<0.0001 | -0.014±0.003 | p<0.0001 | -0.014±0.003 | p<0.0001 | -0.014±0.003 | p<0.0001 | -0.014±0.003 | p<0.0001 | -0.014±0.003 | p<0.0001 | -0.015±0.003 | p<0.0001 | -0.015±0.003 | p<0.0001 | -0.014±0.003 | p<0.0001 | -0.014±0.003 | p<0.0001 | -0.015±0.003 | p<0.0001 | -0.014±0.003 | p<0.0001 | -0.014±0.003 | p<0.0001 | -0.014±0.003 | p<0.0001 | -0.014±0.003 | p<0.0001 |             |          |
| Male sex                    | -0.134±0.045 | p=0.0032 | -0.139±0.045 | p=0.0022 | -0.134±0.046 | p=0.0032 | -0.139±0.046 | p=0.0023 | -0.141±0.045 | p=0.0020 | -0.143±0.045 | p=0.0017 | -0.129±0.046 | p=0.0049 | -0.140±0.046 | p=0.0021 | -0.126±0.046 | p=0.0058 | -0.139±0.045 | p=0.0021 | -0.128±0.046 | p=0.0050 | -0.140±0.045 | p=0.0021 | -0.139±0.045 | p=0.0025 | -0.142±0.045 | p=0.0018 | -0.133±0.045 | p=0.0036 |             |          |
| Body mass index             | -0.067±0.004 | p<0.0001 | -0.067±0.004 | p<0.0001 | -0.067±0.004 | p<0.0001 | -0.067±0.004 | p<0.0001 | -0.067±0.004 | p<0.0001 | -0.068±0.004 | p<0.0001 | -0.067±0.004 | p<0.0001 | -0.068±0.004 | p<0.0001 | -0.066±0.004 | p<0.0001 | -0.066±0.004 | p<0.0001 | -0.066±0.004 | p<0.0001 | -0.068±0.004 | p<0.0001 | -0.067±0.004 | p<0.0001 | -0.067±0.004 | p<0.0001 | -0.067±0.004 | p<0.0001 |             |          |
| Diabetes                    | 0.073±0.064  | p=0.2555 | 0.073±0.064  | p=0.2564 | 0.071±0.064  | p=0.2679 | 0.074±0.064  | p=0.2491 | 0.073±0.064  | p=0.2592 | 0.070±0.064  | p=0.2741 | 0.074±0.064  | p=0.2516 | 0.072±0.064  | p=0.2534 | 0.071±0.064  | p=0.2584 | 0.076±0.064  | p=0.2383 | 0.079±0.064  | p=0.2184 | 0.076±0.064  | p=0.2383 | 0.075±0.064  | p=0.2438 | 0.076±0.064  | p=0.2373 | 0.075±0.064  | p=0.2457 |             |          |
| Total cholesterol : HDL     | -0.085±0.027 | p=0.0018 | -0.086±0.027 | p=0.0014 | -0.083±0.027 | p=0.0023 | -0.085±0.027 | p=0.0018 | -0.085±0.027 | p=0.0017 | -0.084±0.027 | p=0.0020 | -0.085±0.027 | p=0.0017 | -0.085±0.027 | p=0.0017 | -0.085±0.027 | p=0.0017 | -0.087±0.027 | p=0.0013 | -0.088±0.027 | p=0.0012 | -0.085±0.027 | p=0.0017 | -0.085±0.027 | p=0.0018 | -0.086±0.027 | p=0.0016 | -0.085±0.027 | p=0.0017 |             |          |
| Triglyceride                | -0.000±0.000 | p=0.6156 | -0.000±0.000 | p=0.6175 | -0.000±0.000 | p=0.6573 | -0.000±0.000 | p=0.6133 | -0.000±0.000 | p=0.6285 | -0.000±0.000 | p=0.6593 | -0.000±0.000 | p=0.6404 | -0.000±0.000 | p=0.6461 | -0.000±0.000 | p=0.6461 | -0.000±0.000 | p=0.6269 | -0.000±0.000 | p=0.7531 | -0.000±0.000 | p=0.6353 | -0.000±0.000 | p=0.6034 | -0.000±0.000 | p=0.6442 | -0.000±0.000 | p=0.6141 |             |          |
| Systolic blood pressure     | -0.002±0.002 | p=0.2974 | -0.002±0.002 | p=0.2910 | -0.002±0.002 | p=0.2492 | -0.002±0.002 | p=0.2855 | -0.002±0.002 | p=0.2672 | -0.002±0.002 | p=0.2528 | -0.002±0.002 | p=0.2973 | -0.002±0.002 | p=0.2777 | -0.002±0.002 | p=0.2908 | -0.002±0.002 | p=0.3214 | -0.001±0.002 | p=0.3504 | -0.002±0.002 | p=0.2951 | -0.002±0.002 | p=0.2852 | -0.002±0.002 | p=0.3021 | -0.002±0.002 | p=0.3112 |             |          |
| Diastolic blood pressure    | 0.001±0.003  | p=0.6406 | 0.001±0.003  | p=0.6185 | 0.001±0.003  | p=0.6188 | 0.001±0.003  | p=0.6044 | 0.001±0.003  | p=0.6073 | 0.001±0.003  | p=0.6039 | 0.001±0.003  | p=0.6421 | 0.001±0.003  | p=0.6121 | 0.001±0.003  | p=0.6423 | 0.001±0.003  | p=0.6446 | 0.001±0.003  | p=0.7195 | 0.001±0.003  | p=0.6293 | 0.001±0.003  | p=0.6157 | 0.001±0.003  | p=0.6089 | 0.001±0.003  | p=0.6541 |             |          |
| Prevalent CHD               | 0.206±0.073  | p=0.0046 | 0.201±0.073  | p=0.0059 | 0.203±0.073  | p=0.0052 | 0.202±0.073  | p=0.0055 | 0.201±0.073  | p=0.0058 | 0.201±0.073  | p=0.0057 | 0.205±0.073  | p=0.0049 | 0.203±0.073  | p=0.0053 | 0.203±0.073  | p=0.0052 | 0.206±0.073  | p=0.0044 | 0.206±0.073  | p=0.0046 | 0.205±0.073  | p=0.0050 | 0.204±0.073  | p=0.0050 | 0.205±0.073  | p=0.0049 | 0.204±0.073  | p=0.0051 |             |          |
| Smoker                      | -0.370±0.078 | p<0.0001 | -0.370±0.078 | p<0.0001 | -0.371±0.078 | p<0.0001 | -0.376±0.078 | p<0.0001 | -0.372±0.078 | p<0.0001 | -0.371±0.078 | p<0.0001 | -0.371±0.078 | p<0.0001 | -0.374±0.078 | p<0.0001 | -0.372±0.078 | p<0.0001 | -0.362±0.078 | p<0.0001 | -0.362±0.078 | p<0.0001 | -0.374±0.078 | p<0.0001 | -0.373±0.078 | p<0.0001 | -0.372±0.078 | p<0.0001 | -0.375±0.078 | p<0.0001 |             |          |
| Current hormone replacement | -0.317±0.091 | p=0.0005 | -0.316±0.091 | p=0.0005 | -0.332±0.091 | p=0.0003 | -0.321±0.091 | p=0.0005 | -0.320±0.091 | p=0.0005 | -0.328±0.091 | p=0.0003 | -0.320±0.091 | p=0.0005 | -0.324±0.091 | p=0.0004 | -0.314±0.091 | p=0.0006 | -0.311±0.091 | p=0.0007 | -0.316±0.091 | p=0.0005 | -0.325±0.091 | p=0.0005 | -0.321±0.091 | p=0.0005 | -0.317±0.091 | p=0.0005 | -0.317±0.091 | p=0.0005 |             |          |
| Anthypertensive Therapy     | -0.142±0.048 | p=0.0031 | -0.139±0.048 | p=0.0039 | -0.145±0.048 | p=0.0025 | -0.142±0.048 | p=0.0031 | -0.140±0.048 | p=0.0036 | -0.145±0.048 | p=0.0025 | -0.140±0.048 | p=0.0034 | -0.143±0.048 | p=0.0029 | -0.139±0.048 | p=0.0037 | -0.138±0.048 | p=0.0038 | -0.146±0.048 | p=0.0023 | -0.141±0.048 | p=0.0034 | -0.141±0.048 | p=0.0034 | -0.141±0.048 | p=0.0033 | -0.140±0.048 | p=0.0033 |             |          |
| Aspirin within 3 weeks      | 0.135±0.046  | p=0.0033 | 0.133±0.046  | p=0.0036 | 0.129±0.046  | p=0.0049 | 0.133±0.046  | p=0.0037 | 0.132±0.046  | p=0.0042 | 0.130±0.046  | p=0.0046 | 0.135±0.046  | p=0.0038 | 0.134±0.046  | p=0.0038 | 0.134±0.046  | p=0.0038 | 0.135±0.046  | p=0.0032 | 0.136±0.046  | p=0.0030 | 0.134±0.046  | p=0.0036 | 0.133±0.046  | p=0.0038 | 0.132±0.046  | p=0.0038 | 0.132±0.046  | p=0.0039 | 0.134±0.046 | p=0.0035 |
| Lipid treatment             | 0.145±0.048  | p=0.0026 | 0.142±0.048  | p=0.0033 | 0.153±0.048  | p=0.0015 | 0.146±0.048  | p=0.0025 | 0.145±0.048  | p=0.0026 | 0.151±0.048  | p=0.0018 | 0.145±0.048  | p=0.0026 | 0.145±0.048  | p=0.0028 | 0.145±0.048  | p=0.0028 | 0.142±0.048  | p=0.0032 | 0.142±0.048  | p=0.0032 | 0.146±0.048  | p=0.0017 | 0.143±0.048  | p=0.0032 | 0.146±0.048  | p=0.0025 | 0.142±0.048  | p=0.0034 | 0.146±0.048 | p=0.0024 |

\* Each regression model fitted the CRP or IL6 serum levels as the dependent variable with the listed independent variables. Separate models were fitted for each gene expression value and each biomarker. The row labeled dCI contains the regression coefficient gene labeling that column. These values (the association between gene expression and biomarker value) are listed in Table 2 of the published report.

**Supplemental Table II. Association between CRP of IL6 and gene expression adjusting for other factors associated with body mass or adipocytokines**

| Dependent Variable: CRP | Circulating biomarkers associated with body mass or adipocytokines included as covariates |                        |                        |                        |                        |
|-------------------------|-------------------------------------------------------------------------------------------|------------------------|------------------------|------------------------|------------------------|
|                         | Baseline Model                                                                            | ICAM1                  | MCP1                   | PSELECTIN              | TNFR                   |
|                         | coef.±s.e., p-value                                                                       | coef.±s.e., p-value    | coef.±s.e., p-value    | coef.±s.e., p-value    | coef.±s.e., p-value    |
| ALOX5                   | 0.020±0.008, p=0.0110                                                                     | 0.037±0.017, p=0.0261  | 0.040±0.017, p=0.0171  | 0.040±0.017, p=0.0180  | 0.036±0.017, p=0.0329  |
| CD163                   | 0.018±0.008, p=0.0248                                                                     | 0.036±0.016, p=0.0285  | 0.038±0.017, p=0.0236  | 0.038±0.017, p=0.0232  | 0.037±0.016, p=0.0247  |
| CRP                     | -0.012±0.006, p=0.0525                                                                    | -0.012±0.013, p=0.3340 | -0.018±0.013, p=0.1776 | -0.017±0.013, p=0.2001 | -0.016±0.013, p=0.2037 |
| ICAM1                   | 0.010±0.008, p=0.1954                                                                     | 0.020±0.016, p=0.2043  | 0.020±0.016, p=0.2240  | 0.020±0.016, p=0.2221  | 0.015±0.016, p=0.3451  |
| IFIT1                   | 0.008±0.007, p=0.2371                                                                     | 0.013±0.015, p=0.3672  | 0.015±0.015, p=0.3306  | 0.014±0.015, p=0.3312  | 0.012±0.015, p=0.4350  |
| IL6                     | -0.009±0.007, p=0.2036                                                                    | -0.007±0.014, p=0.6449 | -0.012±0.015, p=0.3996 | -0.011±0.014, p=0.4449 | -0.012±0.014, p=0.3920 |
| NFKB1                   | 0.020±0.008, p=0.0129                                                                     | 0.038±0.017, p=0.0262  | 0.038±0.017, p=0.0285  | 0.039±0.017, p=0.0236  | 0.036±0.017, p=0.0370  |
| NFKBIA                  | 0.005±0.007, p=0.4637                                                                     | 0.017±0.015, p=0.2794  | 0.014±0.016, p=0.3630  | 0.017±0.016, p=0.2830  | 0.013±0.015, p=0.3821  |
| PTGER2                  | 0.022±0.008, p=0.0059                                                                     | 0.037±0.016, p=0.0228  | 0.036±0.017, p=0.0286  | 0.037±0.017, p=0.0250  | 0.036±0.016, p=0.0296  |
| S100A9                  | 0.029±0.008, p=0.0001                                                                     | 0.057±0.016, p=0.0004  | 0.063±0.016, p=0.0001  | 0.062±0.016, p=0.0002  | 0.058±0.016, p=0.0003  |
| SELENBP1                | 0.022±0.007, p=0.0026                                                                     | 0.026±0.015, p=0.0891  | 0.032±0.015, p=0.0357  | 0.034±0.015, p=0.0240  | 0.025±0.015, p=0.1003  |
| SIRPA                   | 0.011±0.007, p=0.1296                                                                     | 0.025±0.015, p=0.0818  | 0.025±0.015, p=0.0952  | 0.025±0.015, p=0.0888  | 0.022±0.015, p=0.1305  |
| TLR2                    | 0.012±0.007, p=0.0626                                                                     | 0.025±0.014, p=0.0765  | 0.026±0.014, p=0.0710  | 0.025±0.014, p=0.0725  | 0.021±0.014, p=0.1363  |
| TLR4                    | 0.019±0.008, p=0.0196                                                                     | 0.042±0.017, p=0.0165  | 0.045±0.018, p=0.0102  | 0.044±0.017, p=0.0117  | 0.038±0.017, p=0.0281  |
| TNFRSF1B                | 0.022±0.008, p=0.0043                                                                     | 0.036±0.016, p=0.0228  | 0.039±0.016, p=0.0163  | 0.039±0.016, p=0.0160  | 0.035±0.016, p=0.0315  |
| Dependent Variable: IL6 | Circulating biomarkers associated with body mass or adipocytokines included as covariates |                        |                        |                        |                        |
|                         | Baseline Model                                                                            | ICAM1                  | MCP1                   | PSELECTIN              | TNFR                   |
|                         | coef.±s.e., p-value                                                                       | coef.±s.e., p-value    | coef.±s.e., p-value    | coef.±s.e., p-value    | coef.±s.e., p-value    |
| ALOX5                   | 0.012±0.005, p=0.0142                                                                     | 0.023±0.013, p=0.0779  | 0.024±0.013, p=0.0628  | 0.024±0.013, p=0.0628  | 0.019±0.013, p=0.1320  |
| CD163                   | 0.008±0.005, p=0.1091                                                                     | 0.011±0.013, p=0.4028  | 0.012±0.013, p=0.3325  | 0.012±0.013, p=0.3702  | 0.011±0.013, p=0.3634  |
| CRP                     | -0.009±0.004, p=0.0121                                                                    | -0.015±0.010, p=0.1226 | -0.015±0.010, p=0.1290 | -0.017±0.010, p=0.0935 | -0.017±0.010, p=0.0770 |
| ICAM1                   | 0.009±0.005, p=0.0603                                                                     | 0.022±0.013, p=0.0758  | 0.022±0.013, p=0.0791  | 0.022±0.013, p=0.0789  | 0.017±0.012, p=0.1752  |
| IFIT1                   | 0.008±0.004, p=0.0621                                                                     | 0.017±0.011, p=0.1413  | 0.018±0.011, p=0.1074  | 0.017±0.012, p=0.1289  | 0.014±0.011, p=0.2047  |
| IL6                     | -0.006±0.004, p=0.1490                                                                    | -0.007±0.011, p=0.5594 | -0.007±0.011, p=0.5296 | -0.008±0.011, p=0.4699 | -0.010±0.011, p=0.3546 |
| NFKB1                   | 0.010±0.005, p=0.0500                                                                     | 0.020±0.013, p=0.1402  | 0.019±0.013, p=0.1606  | 0.020±0.013, p=0.1267  | 0.017±0.013, p=0.2080  |
| NFKBIA                  | 0.006±0.005, p=0.2179                                                                     | 0.011±0.012, p=0.3576  | 0.007±0.012, p=0.5352  | 0.011±0.012, p=0.3432  | 0.007±0.012, p=0.5430  |
| PTGER2                  | 0.012±0.005, p=0.0121                                                                     | 0.022±0.013, p=0.0807  | 0.020±0.013, p=0.1197  | 0.022±0.013, p=0.0860  | 0.021±0.013, p=0.1009  |
| S100A9                  | 0.020±0.005, p<0.0001                                                                     | 0.040±0.013, p=0.0013  | 0.044±0.012, p=0.0005  | 0.042±0.013, p=0.0008  | 0.037±0.012, p=0.0026  |
| SELENBP1                | 0.013±0.004, p=0.0033                                                                     | 0.025±0.012, p=0.0317  | 0.027±0.012, p=0.0226  | 0.031±0.012, p=0.0088  | 0.021±0.012, p=0.0708  |
| SIRPA                   | 0.006±0.004, p=0.1326                                                                     | 0.012±0.011, p=0.3092  | 0.010±0.011, p=0.3609  | 0.011±0.011, p=0.3210  | 0.009±0.011, p=0.4482  |
| TLR2                    | 0.011±0.004, p=0.0059                                                                     | 0.027±0.011, p=0.0150  | 0.028±0.011, p=0.0110  | 0.027±0.011, p=0.0146  | 0.021±0.011, p=0.0472  |
| TLR4                    | 0.017±0.005, p=0.0008                                                                     | 0.035±0.013, p=0.0095  | 0.037±0.013, p=0.0064  | 0.036±0.014, p=0.0075  | 0.029±0.013, p=0.0283  |
| TNFRSF1B                | 0.012±0.005, p=0.0091                                                                     | 0.022±0.012, p=0.0823  | 0.022±0.012, p=0.0761  | 0.023±0.012, p=0.0659  | 0.018±0.012, p=0.1467  |

Coefficients refer the relationship between gene expression values indicated in each row and either IL6 or CRP levels as indicated. The "Baseline Model" is the model tabulated (in full) for Supplemental Table 1 and (in part) in Table 2 if the published report. Coefficients listed in the subsequent 5 columns also refer to the gene expression - biomarker level associations (adjusted for all previous covariates) but with the addition of other available cytokines.

**Supplemental Table III.****A. Mouse Megakaryocytes Treated with CRP ( $\Delta$ Ct Values)**

|                 | Control        | 0.2 $\mu$ g/mL            | 2 $\mu$ g/mL              | 20 $\mu$ g/mL             |
|-----------------|----------------|---------------------------|---------------------------|---------------------------|
| <i>ALOX5</i>    | 5.2 $\pm$ 0.8  | 5.0 $\pm$ 1.1, $p=0.888$  | 6.4 $\pm$ 1.2, $p=0.435$  | 5.7 $\pm$ 1.3, $p=0.770$  |
| <i>ICAM1</i>    | 12.0 $\pm$ 0.8 | 7.9 $\pm$ 0.9, $p=0.007$  | 7.7 $\pm$ 0.8, $p=0.005$  | 8.8 $\pm$ 0.8, $p=0.023$  |
| <i>IFIT1</i>    | 11.6 $\pm$ 0.6 | 10.1 $\pm$ 0.7, $p=0.123$ | -                         | 11.5 $\pm$ 0.5, $p=0.937$ |
| <i>IL-6</i>     | 8.1 $\pm$ 0.2  | 8.3 $\pm$ 0.2, $p=0.673$  | 6.6 $\pm$ 0.1, $p<0.001$  | 8.9 $\pm$ 0.1, $p=0.020$  |
| <i>NFKB1</i>    | 9.3 $\pm$ 0.4  | 9.1 $\pm$ 0.9, $p=0.862$  | 10.9 $\pm$ 1.0, $p=0.096$ | 8.7 $\pm$ 0.5, $p=0.550$  |
| <i>NFKBIA</i>   | 5.6 $\pm$ 0.3  | 2.4 $\pm$ 0.1, $p<0.001$  | 0.6 $\pm$ 0.1, $p<0.001$  | 3.7 $\pm$ 0.1, $p<0.001$  |
| <i>PTGER2</i>   | 10.4 $\pm$ 0.5 | 9.8 $\pm$ 0.1, $p=0.366$  | 8.0 $\pm$ 0.3, $p=0.003$  | 9.8 $\pm$ 0.2, $p=0.333$  |
| <i>S100A9</i>   | 5.0 $\pm$ 1.3  | 1.8 $\pm$ 0.5, $p=0.058$  | 5.9 $\pm$ 0.5, $p=0.575$  | 4.4 $\pm$ 0.4, $p=0.683$  |
| <i>SELENBP1</i> | 9.5 $\pm$ 0.2  | 9.6 $\pm$ 0.3, $p=0.701$  | 7.8 $\pm$ 0.3, $p<0.001$  | 8.7 $\pm$ 0.3, $p=0.024$  |
| <i>SIRPA</i>    | 5.5 $\pm$ 0.4  | 7.4 $\pm$ 1.1, $p=0.378$  | 3.2 $\pm$ 0.0, $p=0.428$  | 17.5 $\pm$ 2.3, $p=0.005$ |
| <i>TLR2</i>     | 11.6 $\pm$ 0.3 | 13.0 $\pm$ 0.3, $p=0.074$ | 8.2 $\pm$ 0.9, $p<0.001$  | 11.6 $\pm$ 0.6, $p=0.970$ |
| <i>TLR4</i>     | 9.7 $\pm$ 0.3  | 9.4 $\pm$ 0.3, $p=0.553$  | 10.1 $\pm$ 0.7, $p=0.530$ | 10.1 $\pm$ 0.3, $p=0.422$ |
| <i>TNFRSF1B</i> | 8.4 $\pm$ 0.2  | 8.3 $\pm$ 0.5, $p=0.794$  | 9.6 $\pm$ 0.3, $p=0.018$  | 9.6 $\pm$ 0.4, $p=0.014$  |

**B. Mouse Megakaryocytes Treated with IL-6 ( $\Delta$ CT Values)**

|                 | Control        | 1 $\mu$ g/mL              | 10 $\mu$ g/mL             | 100 $\mu$ g/mL           |
|-----------------|----------------|---------------------------|---------------------------|--------------------------|
| <i>ALOX5</i>    | 5.2 $\pm$ 0.8  | 5.1 $\pm$ 1.2, $p=0.938$  | 4.8 $\pm$ 1.2, $p=0.750$  | -                        |
| <i>ICAM1</i>    | 12.0 $\pm$ 0.8 | 12.4 $\pm$ 1.2, $p=0.791$ | 9.6 $\pm$ 0.9, $p=0.116$  | -                        |
| <i>IFIT1</i>    | 11.6 $\pm$ 0.6 | 11.7 $\pm$ 0.4, $p=0.844$ | 15.0 $\pm$ 0.7, $p=0.003$ | -                        |
| <i>IL-6</i>     | 8.1 $\pm$ 0.2  | 8.5 $\pm$ 0.2, $p=0.352$  | 8.1 $\pm$ 0.2, $p=0.906$  | -                        |
| <i>NFKB1</i>    | 9.3 $\pm$ 0.4  | 9.2 $\pm$ 0.6, $p=0.961$  | 9.0 $\pm$ 0.6, $p=0.647$  | -                        |
| <i>NFKBIA</i>   | 5.6 $\pm$ 0.3  | 4.6 $\pm$ 0.1, $p=0.021$  | 3.6 $\pm$ 0.0, $p<0.001$  | 3.8 $\pm$ 0.4, $p=0.001$ |
| <i>PTGER2</i>   | 10.4 $\pm$ 0.5 | 9.6 $\pm$ 0.1, $p=0.297$  | 9.1 $\pm$ 0.2, $p=0.097$  | -                        |
| <i>S100A9</i>   | 5.0 $\pm$ 1.3  | 8.8 $\pm$ 0.5, $p=0.030$  | 2.5 $\pm$ 0.3, $p=0.122$  | 0.4 $\pm$ 0.2, $p=0.011$ |
| <i>SELENBP1</i> | 9.5 $\pm$ 0.2  | 9.8 $\pm$ 0.1, $p=0.200$  | 9.0 $\pm$ 0.1, $p=0.032$  | -                        |
| <i>SIRPA</i>    | 5.5 $\pm$ 0.4  | 11.1 $\pm$ 4.4, $p=0.176$ | 6.7 $\pm$ 1.2, $p=0.703$  | -                        |
| <i>TLR2</i>     | 11.6 $\pm$ 0.3 | 12.0 $\pm$ 0.2, $p=0.485$ | 11.0 $\pm$ 0.3, $p=0.210$ | 2.3 $\pm$ 0.5, $p<0.001$ |
| <i>TLR4</i>     | 9.7 $\pm$ 0.3  | 10.1 $\pm$ 0.4, $p=0.387$ | 9.5 $\pm$ 0.2, $p=0.639$  | -                        |
| <i>TNFRSF1B</i> | 8.4 $\pm$ 0.2  | 8.2 $\pm$ 0.1, $p=0.570$  | 8.4 $\pm$ 0.3, $p=0.961$  | -                        |

$p$ -values represent comparison to controls

**Supplemental Table IV.****A. Human Platelets Treated with CRP ( $\Delta$ Ct Values)**

|                 | Control        | 0.2 $\mu$ g/mL                  | 2 $\mu$ g/mL                    | 20 $\mu$ g/mL                   |
|-----------------|----------------|---------------------------------|---------------------------------|---------------------------------|
| <i>ALOX5</i>    | 9.4 $\pm$ 0.3  | 8.2 $\pm$ 0.4, <i>p</i> =0.076  | 9.1 $\pm$ 0.3, <i>p</i> =0.697  | 8.7 $\pm$ 0.6, <i>p</i> =0.132  |
| <i>CD163</i>    | 11.7 $\pm$ 0.5 | 12.1 $\pm$ 1.0, <i>p</i> =0.609 | 11.4 $\pm$ 1.0, <i>p</i> =0.825 | 11.2 $\pm$ 1.3, <i>p</i> =0.666 |
| <i>CRP</i>      | 15.3 $\pm$ 1.1 | 14.7 $\pm$ 1.4, <i>p</i> =0.804 | 13.6 $\pm$ 1.8, <i>p</i> =0.341 | 15.9 $\pm$ 2.0, <i>p</i> =0.667 |
| <i>ICAM1</i>    | 14.2 $\pm$ 0.8 | 13.2 $\pm$ 1.1, <i>p</i> =0.527 | 13.1 $\pm$ 1.5, <i>p</i> =0.491 | 14.2 $\pm$ 1.4, <i>p</i> =0.938 |
| <i>IFIT1</i>    | 11.0 $\pm$ 0.5 | 10.4 $\pm$ 0.1, <i>p</i> =0.182 | 9.9 $\pm$ 0.5, <i>p</i> =0.046  | 10.7 $\pm$ 0.4, <i>p</i> =0.651 |
| <i>IL-6</i>     | 14.3 $\pm$ 1.5 | 14.1 $\pm$ 1.3, <i>p</i> =0.914 | 11.4 $\pm$ 1.9, <i>p</i> =0.211 | 13.4 $\pm$ 2.2, <i>p</i> =0.726 |
| <i>NFKB1</i>    | 9.3 $\pm$ 0.5  | 9.1 $\pm$ 0.4, <i>p</i> =0.943  | 8.8 $\pm$ 0.5, <i>p</i> =0.742  | 9.3 $\pm$ 0.5, <i>p</i> =0.962  |
| <i>NFKBIA</i>   | 7.7 $\pm$ 0.4  | 7.4 $\pm$ 0.5, <i>p</i> =0.822  | 8.0 $\pm$ 0.5, <i>p</i> =0.503  | 8.6 $\pm$ 0.6, <i>p</i> =0.124  |
| <i>PTGER2</i>   | 10.8 $\pm$ 0.3 | 10.4 $\pm$ 0.5, <i>p</i> =0.581 | 10.1 $\pm$ 0.4, <i>p</i> =0.230 | 10.6 $\pm$ 0.2, <i>p</i> =0.867 |
| <i>S100A9</i>   | 4.7 $\pm$ 0.4  | 4.4 $\pm$ 0.4, <i>p</i> =0.712  | 4.3 $\pm$ 0.4, <i>p</i> =0.673  | 5.2 $\pm$ 0.3, <i>p</i> =0.469  |
| <i>SELENBP1</i> | 12.5 $\pm$ 0.6 | 12.4 $\pm$ 0.8, <i>p</i> =0.883 | 12.3 $\pm$ 1.1, <i>p</i> =0.977 | 12.2 $\pm$ 0.7, <i>p</i> =0.684 |
| <i>SIRPA</i>    | 11.5 $\pm$ 0.5 | 11.3 $\pm$ 0.9, <i>p</i> =0.841 | 11.9 $\pm$ 1.4, <i>p</i> =0.665 | 11.0 $\pm$ 0.6, <i>p</i> =0.673 |
| <i>TLR2</i>     | 11.5 $\pm$ 0.8 | 11.0 $\pm$ 0.6, <i>p</i> =0.608 | 10.4 $\pm$ 0.8, <i>p</i> =0.291 | 12.1 $\pm$ 0.7, <i>p</i> =0.280 |
| <i>TLR4</i>     | 12.4 $\pm$ 0.5 | 12.0 $\pm$ 0.7, <i>p</i> =0.660 | 12.5 $\pm$ 1.3, <i>p</i> =0.955 | 12.6 $\pm$ 0.8, <i>p</i> =0.929 |
| <i>TNFRSF1B</i> | 12.8 $\pm$ 0.6 | 12.2 $\pm$ 0.7, <i>p</i> =0.456 | 11.5 $\pm$ 0.9, <i>p</i> =0.219 | 11.6 $\pm$ 0.6, <i>p</i> =0.441 |

**B. Human Platelets Treated with IL-6 ( $\Delta$ Ct Values)**

|                 | Control        | 1 $\mu$ g/mL                    | 10 $\mu$ g/mL                   | 100 $\mu$ g/mL                  |
|-----------------|----------------|---------------------------------|---------------------------------|---------------------------------|
| <i>ALOX5</i>    | 9.4 $\pm$ 0.3  | 8.9 $\pm$ 0.6, <i>p</i> =0.536  | 8.6 $\pm$ 0.4, <i>p</i> =0.307  | 8.1 $\pm$ 0.7, <i>p</i> =0.078  |
| <i>CD163</i>    | 11.7 $\pm$ 0.5 | 11.5 $\pm$ 1.8, <i>p</i> =0.931 | 11.0 $\pm$ 0.6, <i>p</i> =0.687 | 11.5 $\pm$ 1.9, <i>p</i> =0.980 |
| <i>CRP</i>      | 15.3 $\pm$ 1.1 | 13.2 $\pm$ 1.6, <i>p</i> =0.402 | 13.1 $\pm$ 1.6, <i>p</i> =0.374 | 12.2 $\pm$ 2.1, <i>p</i> =0.213 |
| <i>ICAM1</i>    | 14.2 $\pm$ 0.8 | 12.1 $\pm$ 1.1, <i>p</i> =0.299 | 12.4 $\pm$ 1.2, <i>p</i> =0.369 | 11.4 $\pm$ 2.0, <i>p</i> =0.166 |
| <i>IFIT1</i>    | 11.0 $\pm$ 0.5 | 10.5 $\pm$ 1.5, <i>p</i> =0.631 | 10.1 $\pm$ 0.8, <i>p</i> =0.419 | 9.4 $\pm$ 1.0, <i>p</i> =0.193  |
| <i>IL-6</i>     | 10.3 $\pm$ 0.5 | 9.8 $\pm$ 0.9, <i>p</i> =0.744  | 9.6 $\pm$ 0.7, <i>p</i> =0.623  | 8.6 $\pm$ 0.9, <i>p</i> =0.081  |
| <i>NFKB1</i>    | 14.3 $\pm$ 1.5 | 11.0 $\pm$ 1.5, <i>p</i> =0.166 | 12.4 $\pm$ 1.2, <i>p</i> =0.416 | 11.7 $\pm$ 1.9, <i>p</i> =0.264 |
| <i>NFKBIA</i>   | 9.3 $\pm$ 0.5  | 9.1 $\pm$ 0.8, <i>p</i> =0.984  | 9.4 $\pm$ 0.6, <i>p</i> =0.756  | 7.9 $\pm$ 0.7, <i>p</i> =0.209  |
| <i>PTGER2</i>   | 7.7 $\pm$ 0.4  | 7.2 $\pm$ 0.5, <i>p</i> =0.664  | 8.9 $\pm$ 0.9, <i>p</i> =0.155  | 7.2 $\pm$ 0.6, <i>p</i> =0.709  |
| <i>S100A9</i>   | 10.8 $\pm$ 0.3 | 9.6 $\pm$ 0.8, <i>p</i> =0.247  | 10.1 $\pm$ 0.5, <i>p</i> =0.535 | 9.6 $\pm$ 1.2, <i>p</i> =0.235  |
| <i>SELENBP1</i> | 4.7 $\pm$ 0.4  | 3.7 $\pm$ 0.3, <i>p</i> =0.122  | 3.9 $\pm$ 0.2, <i>p</i> =0.223  | 4.5 $\pm$ 0.4, <i>p</i> =0.935  |
| <i>SIRPA</i>    | 12.5 $\pm$ 0.6 | 11.3 $\pm$ 0.9, <i>p</i> =0.498 | 11.8 $\pm$ 1.1, <i>p</i> =0.729 | 10.6 $\pm$ 1.4, <i>p</i> =0.241 |
| <i>TLR2</i>     | 11.5 $\pm$ 0.5 | 12.0 $\pm$ 1.1, <i>p</i> =0.712 | 12.0 $\pm$ 1.5, <i>p</i> =0.703 | 10.7 $\pm$ 1.6, <i>p</i> =0.531 |
| <i>TLR4</i>     | 11.5 $\pm$ 0.8 | 11.4 $\pm$ 0.8, <i>p</i> =0.901 | 10.0 $\pm$ 1.2, <i>p</i> =0.348 | 10.7 $\pm$ 1.6, <i>p</i> =0.584 |
| <i>TNFRSF1B</i> | 12.4 $\pm$ 0.5 | 12.7 $\pm$ 1.3, <i>p</i> =0.930 | 11.2 $\pm$ 0.5, <i>p</i> =0.454 | 11.6 $\pm$ 1.9, <i>p</i> =0.598 |
| <i>ALOX5</i>    | 12.8 $\pm$ 0.6 | 11.2 $\pm$ 1.0, <i>p</i> =0.252 | 11.0 $\pm$ 0.7, <i>p</i> =0.206 | 9.5 $\pm$ 1.6, <i>p</i> =0.044  |

*p*-values represent comparison to controls

## Supplemental Figure I

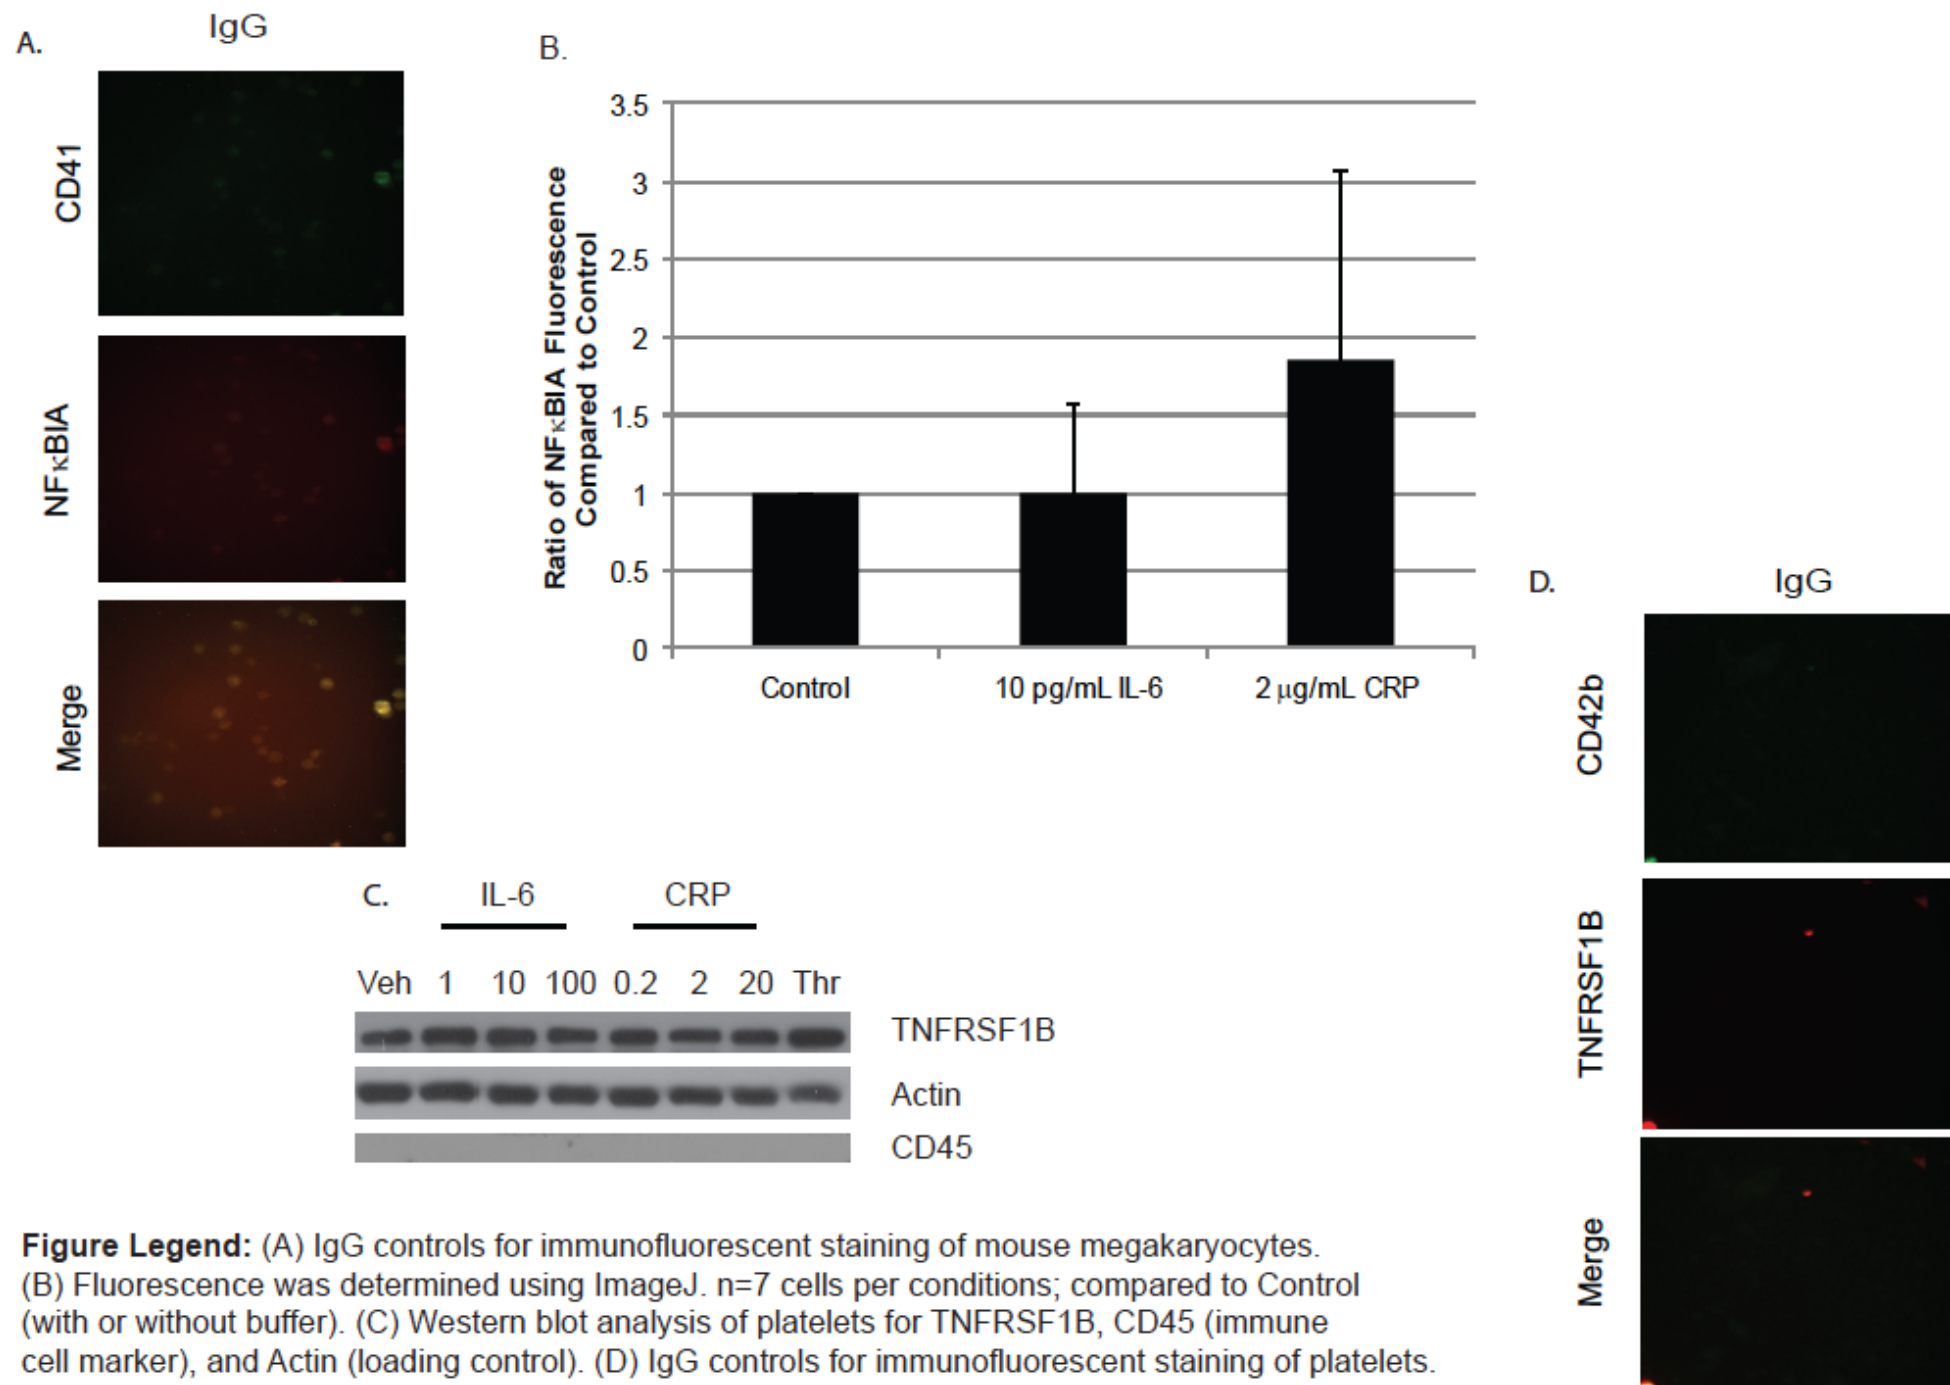

**Figure Legend:** (A) IgG controls for immunofluorescent staining of mouse megakaryocytes. (B) Fluorescence was determined using ImageJ. n=7 cells per conditions; compared to Control (with or without buffer). (C) Western blot analysis of platelets for TNFRSF1B, CD45 (immune cell marker), and Actin (loading control). (D) IgG controls for immunofluorescent staining of platelets.
